# Supplementary material
Source: PubMed Central journal article supplement (PMC2783534)

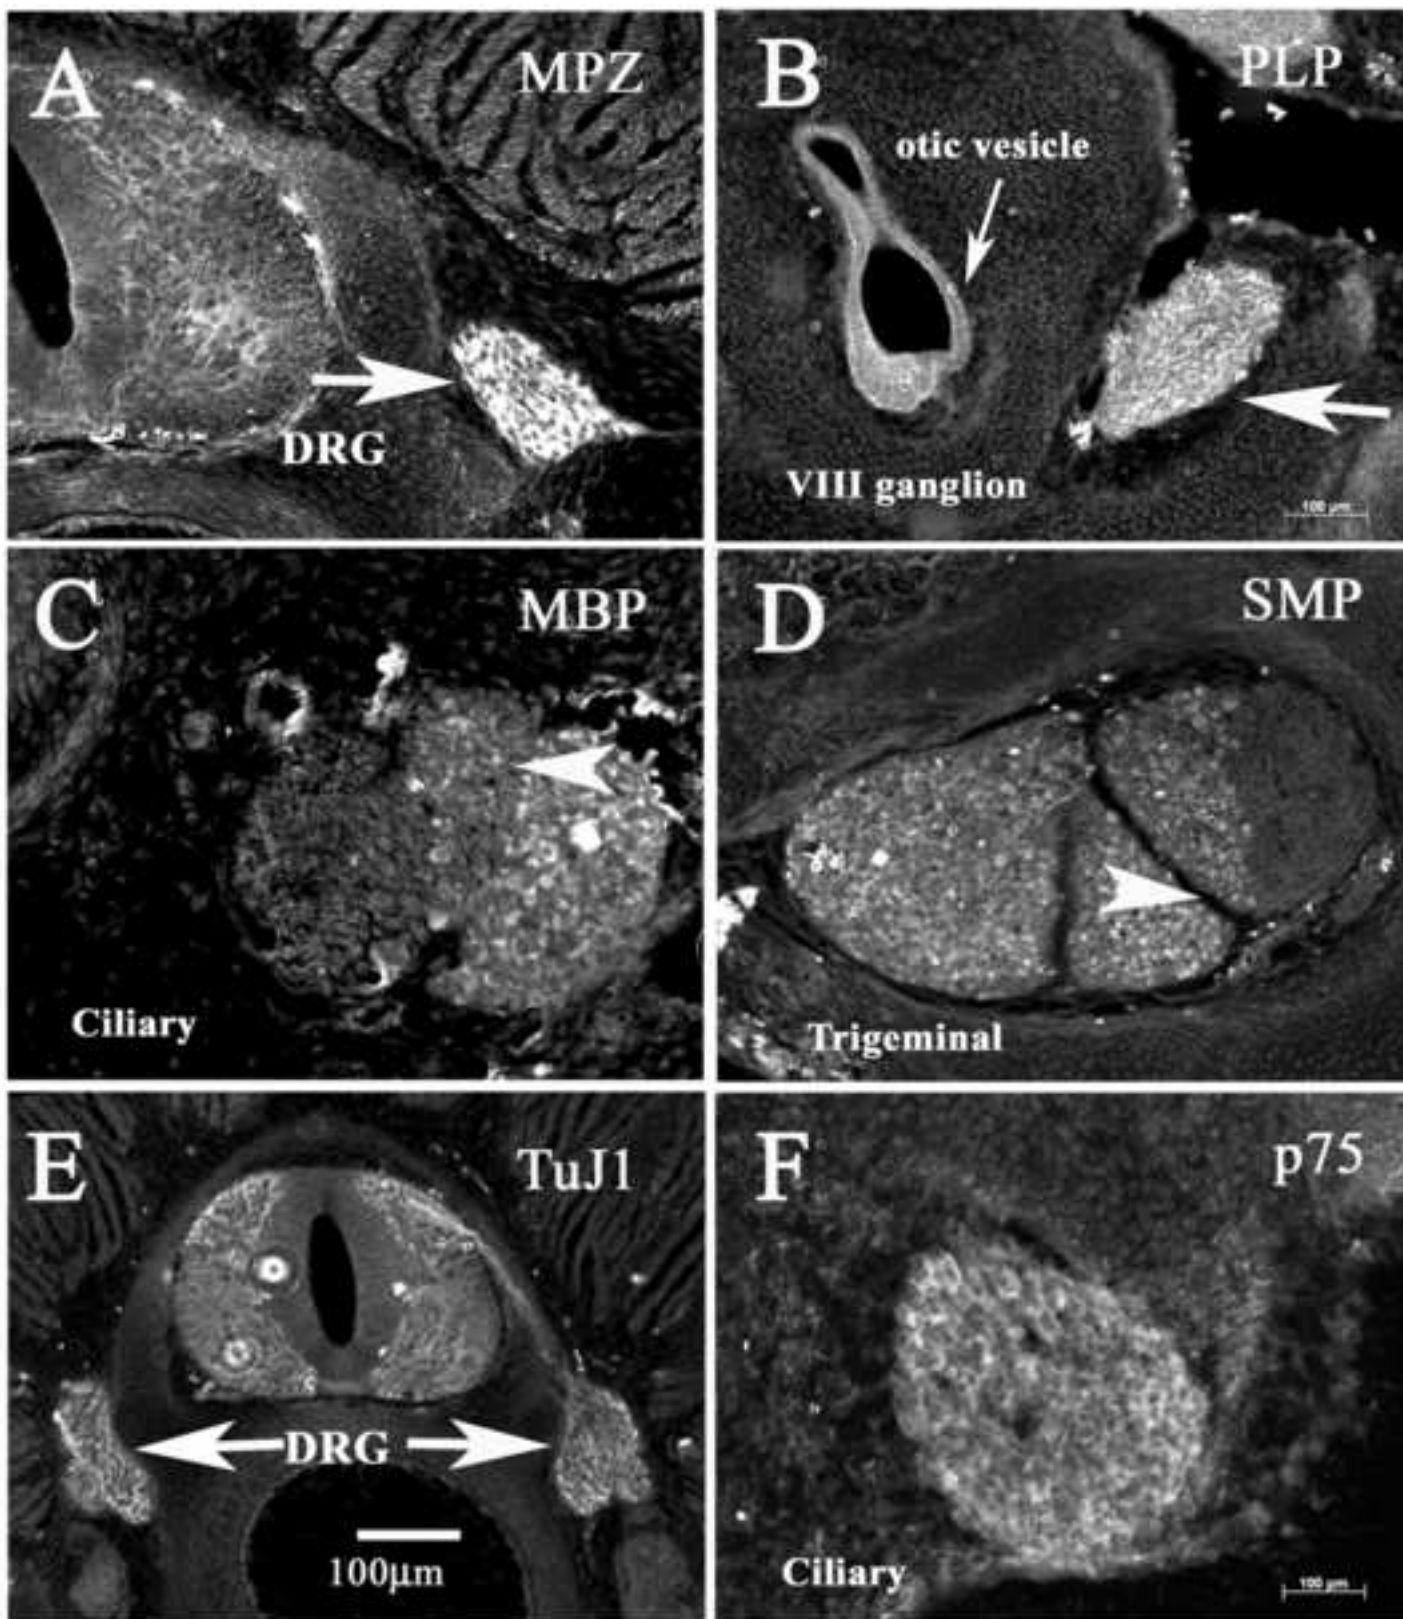

Supplement: NIHMS143828-supplement-01.pdf [file NIHMS143828-supplement-01.pdf]
